# Supplementary material for: Systematic Review and Meta-analysis on the Effect of Soy on Thyroid Function
Source: PubMed Central journal article supplement (PMC6408586; doi:10.1038/s41598-019-40647-x), 2019-03-08
Supplement: 41598_2019_40647_MOESM1_ESM.pdf [file 41598_2019_40647_MOESM1_ESM.pdf]

# **Systematic Review and Meta-analysis on the Effect of Soy on Thyroid Function – Supplementary Information**

## **Short title: Effect of soy on thyroid**

Jemiliat Otun<sup>1</sup>, Amirhossein Sahebkar<sup>2,3,4</sup>, Linda Östlundh<sup>5</sup>, Stephen L Atkin<sup>6</sup>, Thozhukat Sathyapalan<sup>1</sup>

<sup>1</sup>. Academic Diabetes, Endocrinology and Metabolism, Hull York Medical School, University of Hull

<sup>2</sup>. Neurogenic Inflammation Research Center, Mashhad University of Medical Sciences, Mashhad, Iran

<sup>3</sup>. Biotechnology Research Center, Pharmaceutical Technology Institute, Mashhad University of Medical Sciences, Mashhad, Iran

<sup>4</sup>. School of Pharmacy, Mashhad University of Medical Sciences, Mashhad, Iran

<sup>5</sup>. National Medical Library, College of Medicine and Health Sciences, UAE University, Al Ain, UAE

<sup>6</sup>. Weill Cornell Medicine, Doha, Qatar

### *Corresponding Author*

Jemiliat Otun  
Academic Diabetes, Endocrinology and Metabolism,  
Hull York Medical School,  
University of Hull  
Email: [hyjo2@hyms.ac.uk](mailto:hyjo2@hyms.ac.uk)

**Sponsor:** No funding was received for this.

**Conflict of interest:** No author has any conflict of interest

## Appendix 1

### Literature Search

Table showing full search log including search string, results and notes.

### Academic Databases

| Source and date                                                                        | Search string                                                                                                                                                                                                                                                                                                                                                                                                                                                                                                                                                                                                                                                                                                                                                                                                                                                                                                                                                                                                                                                                                                                                                                                                                                                                    | Result      | Notes                                                                                                                                                                                                                                                                                                                                                                                                                                                                                                                                                                                            |
|----------------------------------------------------------------------------------------|----------------------------------------------------------------------------------------------------------------------------------------------------------------------------------------------------------------------------------------------------------------------------------------------------------------------------------------------------------------------------------------------------------------------------------------------------------------------------------------------------------------------------------------------------------------------------------------------------------------------------------------------------------------------------------------------------------------------------------------------------------------------------------------------------------------------------------------------------------------------------------------------------------------------------------------------------------------------------------------------------------------------------------------------------------------------------------------------------------------------------------------------------------------------------------------------------------------------------------------------------------------------------------|-------------|--------------------------------------------------------------------------------------------------------------------------------------------------------------------------------------------------------------------------------------------------------------------------------------------------------------------------------------------------------------------------------------------------------------------------------------------------------------------------------------------------------------------------------------------------------------------------------------------------|
| <b>PubMed</b><br><br><b>Coverage:</b><br>1879-<br><br><b>Search Date</b><br>2016-08-01 | ((TSH[Title/Abstract]) OR (((("receptors, thyrotropin"[Mesh] OR "Iodide peroxidase"[Mesh] OR "TPO protein, human"[Supplementary Concept] OR "thyroid microsomal antibodies"[Supplementary Concept] OR "thyroid dyshormonogenesis 1" [Supplementary Concept] OR "thyroid gland"[Mesh] OR "thyroid hormones"[Mesh] OR "thyroid diseases"[Mesh] OR "receptors, thyroid hormone"[Mesh] OR thyrotropin [Title/Abstract] OR triiodothyronine[Title/Abstract] OR thyroxine[Title/Abstract] OR "iodide peroxidase"[Title/Abstract] OR "TPO protein"[Title/Abstract] OR "TPO proteins"[Title/Abstract]OR thyroid*[Title/Abstract] OR T4[Title/Abstract]) OR T3[Title/Abstract] OR hypothyroid*[Title/Abstract] OR levothyroxine[Title/Abstract]))) AND ((((((("genistein combined polysaccharide" [Supplementary Concept] OR "glycitein" [Supplementary Concept] OR "lipofundin s" [Supplementary Concept] OR "soybean oil"[Mesh] OR "soybeans"[Mesh] OR "genistin" [Supplementary Concept] OR "soy foods"[Mesh] OR "sodium-iodide symporter" [Supplementary Concept] OR "daidzein" [Supplementary Concept] OR "phytoestrogens"[Mesh] OR equol[Title/Abstract] OR phytoestrogen*[Title/Abstract] OR genestein[Title/Abstract] OR genistein[Title/Abstract] OR daidzein[Title/Abstract] OR | <b>1501</b> | All terms searched in title and abstract and in MeSH when available.<br><br>No Filters or limitations applied<br><br><b>Notes for search terms applied:</b><br><br>"Hypothyroidism": included under "Thyroid Diseases" in MeSH<br><br>"Thyrotropin" and "Thyrotropin, Beta Subunit" included under: "Receptors, Thyrotropin" in MeSH<br><br>"Thyroid Hormone Receptors alpha" and "Thyroid Hormone Receptors beta" are included under "Receptors, Thyroid Hormone" in MeSH<br><br>"Thyroxine", "Triiodothyronine, Reverse" and "Triiodothyronine" are included under: "Thyroid Hormones" in MeSH |

|                                                                                          |                                                                                                                                                                                                                                                                                                                                                                                                                                                                                                                                                                                                                                                                                                                                                                                                                                                                                                                                                                                                                                                                                                                                                                                                                                                                                                                                                                       |             |                                                                                                                                                                                                                                                                                                                                                                                                                                                                                                                                                                                                                                                                                                                                             |
|------------------------------------------------------------------------------------------|-----------------------------------------------------------------------------------------------------------------------------------------------------------------------------------------------------------------------------------------------------------------------------------------------------------------------------------------------------------------------------------------------------------------------------------------------------------------------------------------------------------------------------------------------------------------------------------------------------------------------------------------------------------------------------------------------------------------------------------------------------------------------------------------------------------------------------------------------------------------------------------------------------------------------------------------------------------------------------------------------------------------------------------------------------------------------------------------------------------------------------------------------------------------------------------------------------------------------------------------------------------------------------------------------------------------------------------------------------------------------|-------------|---------------------------------------------------------------------------------------------------------------------------------------------------------------------------------------------------------------------------------------------------------------------------------------------------------------------------------------------------------------------------------------------------------------------------------------------------------------------------------------------------------------------------------------------------------------------------------------------------------------------------------------------------------------------------------------------------------------------------------------------|
|                                                                                          | glycitein[Title/Abstract] OR soy*[Title/Abstract] OR genistin[Title/Abstract] OR "lipofundin s"[Title/Abstract] OR "sodium-iodide symporter"[Title/Abstract] OR GCP[Title/Abstract])) OR "phytoestrogens" [Pharmacological Action])) OR ((isoflavones[Title/Abstract]) OR "Isoflavones"[Mesh]))                                                                                                                                                                                                                                                                                                                                                                                                                                                                                                                                                                                                                                                                                                                                                                                                                                                                                                                                                                                                                                                                       |             | "Levothyroxine" refers to "Thyroxine", which is included under "Thyroid Hormones" in MeSH<br><br><u>"Genistein" and "Equol" are included under "Isoflavones" in Mesh</u>                                                                                                                                                                                                                                                                                                                                                                                                                                                                                                                                                                    |
| <b>EMBASE</b><br>(OVID)<br><b>Coverage:</b><br>1974-<br><b>Search Date</b><br>2016-07-17 | ((TSH OR thyrotropin OR triiodothyronine OR thyroxine or "Iodide peroxidase") ab. OR (TSH OR thyrotropin OR triiodothyronine OR thyroxine OR "Iodide peroxidase") OR ("TPO protein" OR "TPO proteins").ab. OR ("TPO protein" OR "TPO proteins").ti. OR (thyroid* or T4 OR T3 or hypothyroid* OR levothyroxine).ab. OR (thyroid* or T4 or T3 OR hypothyroid* OR levothyroxine).ti.) OR (thyrotropin receptor/ OR thyrotropin/ OR thyrotropin beta subunit/ OR thyroid peroxidase antibody/ OR iodide peroxidase/ OR thyroid gland/ OR thyroid hormone/ OR thyroxine/ OR 3,3',5' triiodothyronine/ OR liothyronine/ OR levothyroxine/ OR thyroid disease/ OR hypothyroidism/ OR thyroid hormone receptor/) AND (equol OR phytoestrogen*OR genestein or genistein or daidzein or glycitein or soy* or genistin or "lipofundin s" or "sodium-iodide symporter" or GCP or isoflavones).ab. or (equol or phytoestrogen*OR genestein or genistein or daidzein or glycitein or soy* or genistin or "lipofundin s" or "sodium-iodide symporter" or GCP OR isoflavones).ti.OR (equol/ OR glycitein/ OR lipofundin S/ OR soy food/ OR soybean oil/ OR soybean/ OR genistin/ OR soybean milk/ OR soybean protein/ OR sodium iodide symporter/ OR daidzein/ OR phytoestrogen/ OR isoflavone derivative/ OR genistein/ OR thyroid dysgenesis/ OR thyroid hormone receptor alpha/ OR | <b>1885</b> | All terms searched in title and abstract (here marked with ti. and ab. ) and in MeSH (here marked with / )when available<br><br>No Filters or limitations applied<br><br><b>Notes for search terms applied:</b><br><br>Supplementary Concepts applied in PubMed: "TPO Protein", "Human, Thyroid Microsomal Antibodies", "Glycitein", "Lipofundin S", "Genistin", "Sodium-iodide Symporter", "Daidzein" and "Pharamlogical Action", "Phytoestrogens" not available in the Emtree<br><br>"Genistein Combined Polysaccharide" is mapped to, and included under "Genistein" in the Emtree<br><br>"Thyroid Dys hormonogenesis" is mapped to, and included under "Thyroid Dysgenesis" in the Emtree<br><br>"Thyroid Peroxidase Antibody" included |

|                                                                              |                                                                                                                                                                                                                                                                                                                                                                                                                                                                                                       |                    |                                                                                                                                                                                                                                                                                                                                                                                                                                                                                                                                                                                                                                     |
|------------------------------------------------------------------------------|-------------------------------------------------------------------------------------------------------------------------------------------------------------------------------------------------------------------------------------------------------------------------------------------------------------------------------------------------------------------------------------------------------------------------------------------------------------------------------------------------------|--------------------|-------------------------------------------------------------------------------------------------------------------------------------------------------------------------------------------------------------------------------------------------------------------------------------------------------------------------------------------------------------------------------------------------------------------------------------------------------------------------------------------------------------------------------------------------------------------------------------------------------------------------------------|
|                                                                              | thyroid hormone receptor beta/))                                                                                                                                                                                                                                                                                                                                                                                                                                                                      |                    | <p>in the Emtree</p> <p>"Triiodothyronine, Reverse" mapped to "3,3',5' triiodothyronine" in the Emtree</p> <p>“Triiodothyronine” is mapped to “liothyronine” in the Emtree</p> <p>Levothyroxine is included in the Emtree</p> <p>“Isoflavanes” mapped to “Isoflavane Derivateive” in the Emtree</p> <p>“Thyroxine”, “Thyrotropin Beta Subunit”, "Thyroid Hormone Receptors Alpha", "Hypothyroidism", "Thyroid Hormone Receptors Beta", “Soy Bean Protein”, "Soy Bean Milk", "Genistein", and "Equol" are searched separately in the Emtree</p> <p>"Thyroid Dysmorphogenesis 1" is mapped to: "Thyroid Dysgenesis" in the Emtree</p> |
| <p><b>Medline</b><br/>(Web of Science)</p> <p><b>Coverage:</b><br/>1950-</p> | <p>((TOPIC: (TSH OR thyrotropin OR triiodothyronine OR thyroxine OR "Iodide peroxidase" OR "TPO protein" OR "TPO proteins" OR thyroid* OR T4) OR T3) OR hypothyroid* OR levothyroxine) OR MH= Receptors, Thyrotropin OR Iodide Peroxidase OR Thyroid Gland OR Thyroid Hormones OR Thyroid Diseases OR Receptors, Thyroid Hormone OR Hypothyroidism OR Thyrotropin) AND TOPIC: (equol OR phytoestrogen*OR genestein OR genistein OR daidzein OR glycitein OR soy* OR genistin OR "lipofundin s" OR</p> | <p><b>1428</b></p> | <p>All terms searched in topic (here marked with TOPIC which includes the fields title and abstract) and in MeSH (here marked with MH) when available</p> <p>No Filters or limitations applied</p> <p><b>Notes for search terms applied:</b></p>                                                                                                                                                                                                                                                                                                                                                                                    |

|                                            |                                                                                                                                                 |                   |                                                                                                                                                                                                                                                                                                                                                                                                                                                                                                                                                                                                                                                                                                                                                                                                                      |
|--------------------------------------------|-------------------------------------------------------------------------------------------------------------------------------------------------|-------------------|----------------------------------------------------------------------------------------------------------------------------------------------------------------------------------------------------------------------------------------------------------------------------------------------------------------------------------------------------------------------------------------------------------------------------------------------------------------------------------------------------------------------------------------------------------------------------------------------------------------------------------------------------------------------------------------------------------------------------------------------------------------------------------------------------------------------|
| <p><b>Search Date:</b><br/>2016- 08-01</p> | <p>"sodium-iodide symporter" OR GCP OR isoflavones) OR MH= (Soybean Oil OR Soybeans OR Soy Foods OR Phytoestrogens OR Isoflavones))</p>         |                   | <p>Supplementary Concepts applied in PubMed: "TPO Protein, Human", "Thyroid Microsomal Antibodies", "Thyroid Dyshormonogenesis", "Genistein Combined Polysaccharide", "Glycitein", "Lipofundin S", "Genistin", "Sodium-iodide Symporter", "Daidzein" and Pharamlogical Action, "Phytoestrogens not available in MEDLINE's MeSH</p> <p>"Levothyroxine" is mapped to "Thyroxine" in MEDLINE's MeSH</p> <p>"Hypothyroidism" and "Thyrotropin" are included as separate MEDLINE's MeSH terms</p> <p>"Thyrotropin, Beta Subunit" are included under "Thyrotropin" in MEDLINE's MeSH</p> <p>"Thyroid Hormone Receptors Alpha" and "Thyroid Hormone Receptors Beta" are included under "Receptors, Thyroid Hormone" in MEDLINE's MeSH</p> <p>"Genistein" and "Equol" are included under "Isoflavones" in MEDLINE's MeSH</p> |
| <p><b>Cochrane</b></p>                     | <p>((ti,ab,kw: TSH or thyrotropin or triiodothyronine or thyroxine or "Iodide peroxidase" or "TPO protein" or "TPO proteins" or thyroid* or</p> | <p><b>111</b></p> | <p>All terms searched in the field for title, abstract and keyword (here marked with</p>                                                                                                                                                                                                                                                                                                                                                                                                                                                                                                                                                                                                                                                                                                                             |

|                                                                                                                    |                                                                                                                                                                                                                                                                                                                                                                                                                                                                                                                                                                                                                                                                                                                                                                        |                                                                                                                                                                                                                                                                                                                                                                                                                                                                                                                                                                                                                                                                                                                                                                                                                                                                                                                                   |
|--------------------------------------------------------------------------------------------------------------------|------------------------------------------------------------------------------------------------------------------------------------------------------------------------------------------------------------------------------------------------------------------------------------------------------------------------------------------------------------------------------------------------------------------------------------------------------------------------------------------------------------------------------------------------------------------------------------------------------------------------------------------------------------------------------------------------------------------------------------------------------------------------|-----------------------------------------------------------------------------------------------------------------------------------------------------------------------------------------------------------------------------------------------------------------------------------------------------------------------------------------------------------------------------------------------------------------------------------------------------------------------------------------------------------------------------------------------------------------------------------------------------------------------------------------------------------------------------------------------------------------------------------------------------------------------------------------------------------------------------------------------------------------------------------------------------------------------------------|
| <p><b>Coverage:</b>All databases and all publication years are included</p> <p><b>Search Date:</b> 2016- 07-19</p> | <p>T4 or T3 or hypothyroid* or levothyroxine) OR (MeSH descriptor: Receptors, Thyrotropin OR Iodide Peroxidase OR Thyroid Gland OR Thyroid Hormones OR Thyroid Diseases OR Receptors, Thyroid Hormone) AND (ti,ab,kw: equol or phytoestrogen*OR genestein or genistein or daidzein or glycitein or soy* or genistin or "lipofundin s" or "sodium-iodide symporter" or GCP or isoflavones) OR MeSH descriptor: [Soybean Oil] OR [Soybeans] OR [Soybean Proteins] OR [Soy Milk] OR [Phytoestrogens] OR [Isoflavones] OR [Equol] OR [Genistein] OR [Hypothyroidism] OR [Thyrotropin] OR [Thyrotropin, beta Subunit] OR [Thyroid Hormone Receptors alpha] OR [Thyroid Hormone Receptors beta] OR [Thyroxine] OR OR [Triiodothyronine, Reverse] OR [Triiodothyronine]))</p> | <p>ti,ab,kw) and in MeSH (here marked with "MeSH descriptor" ) when available</p> <p>No Filters or limitations applied</p> <p><b>Notes for search terms applied:</b></p> <p>Supplementary Concepts applied in PubMed: "TPO Protein, Human", Thyroid Microsomal Antibodies", "Thyroid Dyshormonogenesis", "Genistein Combined Polysaccharide", "Glycitein", "Lipofundin S", "Genistin", "Sodium-iodide Symporter", "Daidzein" and Pharamlogical Action, "Phytoestrogens" not available in Cochrane’s MeSH</p> <p>"Soy Bean Protein", "Soy Milk" (used for "Soy Bean Milk"), "Equol", "Genistein", "Hypothyroidism", "Thyrotropin", "Thyrotropin, Beta Subunit", "Thyroid Hormone Receptors Alpha", "Thyroid Hormone Receptors Beta", "Thyroxine", "Triiodothyronine, Reverse" and "Triiodothyronine" are searched separately in Cochrane’s MeSH</p> <p>"Levothyroxine" refers to “Thyroxine”, which is included under “Thyroid</p> |
|--------------------------------------------------------------------------------------------------------------------|------------------------------------------------------------------------------------------------------------------------------------------------------------------------------------------------------------------------------------------------------------------------------------------------------------------------------------------------------------------------------------------------------------------------------------------------------------------------------------------------------------------------------------------------------------------------------------------------------------------------------------------------------------------------------------------------------------------------------------------------------------------------|-----------------------------------------------------------------------------------------------------------------------------------------------------------------------------------------------------------------------------------------------------------------------------------------------------------------------------------------------------------------------------------------------------------------------------------------------------------------------------------------------------------------------------------------------------------------------------------------------------------------------------------------------------------------------------------------------------------------------------------------------------------------------------------------------------------------------------------------------------------------------------------------------------------------------------------|

|                                              |  |             |                                                                                                                                                                     |
|----------------------------------------------|--|-------------|---------------------------------------------------------------------------------------------------------------------------------------------------------------------|
|                                              |  |             | Hormones” in Cochrane’s MeSH<br><br>"Thyroxine", "Triiodothyronine, Reverse"<br>and "Triiodothyronine" are included under:<br>“Thyroid Hormones” in Cochrane’s MeSH |
| <b>Total references retrieved</b>            |  | <b>4925</b> |                                                                                                                                                                     |
| <b>Total references after de-duplication</b> |  | <b>1816</b> |                                                                                                                                                                     |

#### Updated search in PubMed, 2018-08-01

| Source and date                                            | Search string                                                                                                                                                                                                                                                                                                                                                                                                                                                                                                                                                                                                                                                                               | Result     | Notes                                                                  |
|------------------------------------------------------------|---------------------------------------------------------------------------------------------------------------------------------------------------------------------------------------------------------------------------------------------------------------------------------------------------------------------------------------------------------------------------------------------------------------------------------------------------------------------------------------------------------------------------------------------------------------------------------------------------------------------------------------------------------------------------------------------|------------|------------------------------------------------------------------------|
| <b>PubMed</b><br><br><b>Search Date</b><br><br>2018- 08-01 | ((TSH[Title/Abstract]) OR (((("receptors,<br>thyrotropin"[Mesh] OR "Iodide peroxidase"[Mesh]<br>OR "TPO protein, human"[Supplementary Concept]<br>OR "thyroid microsomal antibodies"[Supplementary<br>Concept] OR "thyroid dysmorphogenesis 1"<br>[Supplementary Concept] OR "thyroid<br>gland"[Mesh] OR "thyroid hormones"[Mesh] OR<br>"thyroid diseases"[Mesh] OR "receptors, thyroid<br>hormone"[Mesh] OR thyrotropin [Title/Abstract]<br>OR triiodothyronine[Title/Abstract] OR<br>thyroxine[Title/Abstract] OR "iodide<br>peroxidase"[Title/Abstract] OR "TPO<br>protein"[Title/Abstract] OR "TPO<br>proteins"[Title/Abstract]OR<br>thyroid*[Title/Abstract] OR T4[Title/Abstract]) OR | <b>145</b> | An update of search 1 above.<br><br>Publication filter for 2016- 08-01 |

|                                                     |                                                                                                                                                                                                                                                                                                                                                                                                                                                                                                                                                                                                                                                                                                                                                                                                                                                                                                                                       |                   |  |
|-----------------------------------------------------|---------------------------------------------------------------------------------------------------------------------------------------------------------------------------------------------------------------------------------------------------------------------------------------------------------------------------------------------------------------------------------------------------------------------------------------------------------------------------------------------------------------------------------------------------------------------------------------------------------------------------------------------------------------------------------------------------------------------------------------------------------------------------------------------------------------------------------------------------------------------------------------------------------------------------------------|-------------------|--|
|                                                     | <p>T3[Title/Abstract] OR hypothyroid*[Title/Abstract] OR levothyroxine[Title/Abstract]))) AND ((((((("genistein combined polysaccharide" [Supplementary Concept] OR "glycitein" [Supplementary Concept] OR "lipofundin s" [Supplementary Concept] OR "soybean oil"[Mesh] OR "soybeans"[Mesh] OR "genistin" [Supplementary Concept] OR "soy foods"[Mesh] OR "sodium-iodide symporter" [Supplementary Concept] OR "daidzein" [Supplementary Concept] OR "phytoestrogens"[Mesh] OR equol[Title/Abstract] OR phytoestrogen*[Title/Abstract] OR genestein[Title/Abstract] OR genistein[Title/Abstract] OR daidzein[Title/Abstract] OR glycitein[Title/Abstract] OR soy*[Title/Abstract] OR genistin[Title/Abstract] OR "lipofundin s"[Title/Abstract] OR "sodium-iodide symporter"[Title/Abstract] OR GCP[Title/Abstract]))) OR "phytoestrogens" [Pharmacological Action])) OR ((isoflavones[Title/Abstract]) OR "Isoflavones"[Mesh]))</p> |                   |  |
| <p><b>Total references after de-duplication</b></p> |                                                                                                                                                                                                                                                                                                                                                                                                                                                                                                                                                                                                                                                                                                                                                                                                                                                                                                                                       | <p><b>145</b></p> |  |

**Grey Sources**



| Date         | Source                                                  | Search string                                                                                                                                                                                                                                                                                                                                 | Result | Notes                                                                                                                 |
|--------------|---------------------------------------------------------|-----------------------------------------------------------------------------------------------------------------------------------------------------------------------------------------------------------------------------------------------------------------------------------------------------------------------------------------------|--------|-----------------------------------------------------------------------------------------------------------------------|
| 2016- 08- 03 | <b>ProQuest<br/>Dissertation<br/>and Theses</b>         | TSH OR thyrotropin OR triiodothyronine OR thyroxine OR "Iodide peroxidase" OR "TPO protein" OR "TPO proteins" OR thyroid* OR T4 OR T3 OR hypothyroid* OR levothyroxine AND equol OR phytoestrogen*OR genestein OR genistein OR daidzein OR glycitein OR soy* OR genistin OR "lipofundin s" OR "sodium-iodide symporter" OR GCP OR isoflavones | 48     | Searched in the field for "Abstract."<br><br>Filters for:<br><br>"Doctoral Dissertation" and "Human Studies" applied. |
| 2016- 08- 03 | <b>Ethos</b><br>(Doctorial theses from British Library) | ((thyroid AND (soy OR phytoestrogen OR isoflavones OR equol))                                                                                                                                                                                                                                                                                 | 0      | Searched in the field for "Abstract" and "Theses Title"                                                               |
| 2016- 08- 03 | <b>Open Grey</b><br>(Grey Literature in Europe)         | (thyroid AND (soy OR phytoestrogen OR isoflavones OR equol))                                                                                                                                                                                                                                                                                  | 0      | Limited search functions available                                                                                    |
| 2016- 08- 03 | <b>Clinical Trials.gov</b>                              | ((thyroid AND (soy OR phytoestrogen OR isoflavones OR equol))                                                                                                                                                                                                                                                                                 | 3      | Limited search functions available<br><br>Limitation: "Studies With                                                   |

|                                              |                                                                 |                                                               |           |                                                          |
|----------------------------------------------|-----------------------------------------------------------------|---------------------------------------------------------------|-----------|----------------------------------------------------------|
|                                              |                                                                 |                                                               |           | Results" applied                                         |
| 2016- 08- 03                                 | <b>The New York Academy of Medicine Grey Literature report.</b> | ((thyroid AND (soy OR phytoestrogen OR isoflavones OR equol)) | 0         | Searched in the field for "Title" and "Subject Headings" |
| <b>Total references retrieved</b>            |                                                                 |                                                               | <b>51</b> |                                                          |
| <b>Total references after de-duplication</b> |                                                                 |                                                               | <b>51</b> |                                                          |

**Appendix 2**  
Baseline Characteristics

**Appendix 2: Data extraction of included studies: Identification, Method and Baseline Characteristics**

| Identification             |                    |                      | Method     |                           |                           | Baseline Characteristics |                                  |                            |      |                       |          |      |               |                              |                           |
|----------------------------|--------------------|----------------------|------------|---------------------------|---------------------------|--------------------------|----------------------------------|----------------------------|------|-----------------------|----------|------|---------------|------------------------------|---------------------------|
| First Author               | Duration           | Recruitment Location | RCT Design | Inclusion Criteria Stated | Exclusion Criteria Stated | Sex                      | Postmenopausal/<br>Premenopausal | Mean BMI kg/m <sup>2</sup> |      |                       | Mean age |      | Ethnicity     | Medical status               |                           |
|                            |                    |                      |            |                           |                           |                          |                                  | Intervention Group(s)      | PI   | Intervention Group(s) | PI       |      |               |                              |                           |
| <b>Bitto, A 2010</b>       | 3 y                | Italy                | Parallel   | yes                       | yes                       | F                        | Postmenopausal                   | 24.3                       |      | 25.6                  | 53.8     |      | 53.5          | Not specified                | NSMC                      |
| <b>Bruce, B 2003</b>       | 180 d              | USA                  | Parallel   | yes                       | yes                       | F                        | Postmenopausal                   | 20.5                       |      | 20.2                  | 68.9     |      | 69.9          | W:22%                        | NSMC                      |
| <b>Dillingham, A 2007</b>  | 57 d               | Canada               | Crossover  | yes                       | yes                       | M                        | N/A                              | 25.1                       | 25.3 | 25.3                  | 27.9     |      | Not specified | NSMC                         |                           |
| <b>Duncan, A 1999</b>      | 3 Menstrual cycles | USA                  | Crossover  | yes                       | yes                       | F                        | Premenopausal                    | 22.8                       | 22.8 | 23.1                  | 63.8     | 63.9 | 64.6          | Not specified                | NSMC                      |
| <b>Duncan, A 1999</b>      | 279 d              | USA                  | Crossover  | yes                       | yes                       | F                        | Postmenopausal                   | 25.3                       | 25.4 | 25.4                  | 56.9     |      | Not specified | NSMC                         |                           |
| <b>Jayagopal, V 2002</b>   | 12 w               | United Kingdom       | Crossover  | yes                       | yes                       | F                        | Postmenopausal                   | 32.2                       |      |                       | 62.5     |      | Not specified | Type 2 Diabetic              |                           |
| <b>Khaodhiar, L 2008</b>   | 12 w               | USA                  | Parallel   | yes                       | yes                       | F                        | Postmenopausal                   | 29.9                       | 28.3 | 27.4                  | 52.2     | 53.2 | 53.8          | W: 62%*<br>AA:30%*<br>O: 8%* | NSMC                      |
| <b>Lazarvic, B 2011</b>    | 3-6 w              | Norway               | Parallel   | yes                       | yes                       | M                        | N/A                              | 26.4                       |      | 25.9                  | 60.7     |      | 58.4          | Not specified                | Localised Prostate Cancer |
| <b>Mittal, N 2011</b>      | 12 w               | India                | Parallel   | yes                       | yes                       | F                        | Not specified                    | 24.99                      |      | 24.94                 | 49.14    |      | 46.28         | IN: 100%Z                    | Bilateraloopho-rectomy    |
| <b>Persky, V 2002</b>      | 6 m                | USA                  | Parallel   | yes                       | yes                       | F                        | Postmenopausal                   | 28.0                       | 26.9 | 29.6                  | 59.3     | 61.9 | 61.0          | Not specified                | Hypercholesterolemic      |
| <b>Sathyapalan, T 2017</b> | 6 m                | United Kingdom       | Parallel   | yes                       | yes                       | F                        | Postmenopausal                   | 26.3                       |      | 24.6                  | 52       |      | 52            | W: 100%                      | NSMC                      |
| <b>Sathyapalan, T 2011</b> | 16w                | United Kingdom       | Crossover  | yes                       | yes                       | 52F<br>8M                | Not specified                    | 29.4                       |      | 29.2                  | 57.2     |      | Not specified | Subclinical hypothyroidism   |                           |

**Appendix 2 continued**

| Identification               |          |                      | Method     |                           |                           | Baseline Characteristics |                                  |                       |      |      |                            |      |               |                            |                                                       |
|------------------------------|----------|----------------------|------------|---------------------------|---------------------------|--------------------------|----------------------------------|-----------------------|------|------|----------------------------|------|---------------|----------------------------|-------------------------------------------------------|
| First Author                 | Duration | Recruitment Location | RCT Design | Inclusion Criteria Stated | Exclusion Criteria Stated | Sex                      | Postmenopausal/<br>Premenopausal | Mean Age              |      |      | Mean BMI kg/m <sup>2</sup> |      | Ethnicity     | Medical status             |                                                       |
|                              |          |                      |            |                           |                           |                          |                                  | Intervention Group(s) |      | Pl   | Intervention Group(s)      |      |               |                            | Pl                                                    |
| <b>Steinberg, F 2011</b>     | 2 y      | USA                  | Parallel   | yes                       | yes                       | F                        | Postmenopausal                   | 54.9                  | 54.5 | 55.0 | 25.3                       | 24.9 | 25.4          | Not specified              | NSMC                                                  |
| <b>Tousen, Y 2011</b>        | 12 m     | Japan                | Parallel   | yes                       | yes                       | F                        | Postmenopausal                   | 53.6*                 |      | 52   | 22.0                       |      | 21.9          | JP:100%                    | NSMC                                                  |
| <b>Yim, C 2007</b>           | 3 m      | South Korea          | Parallel   | yes                       | no                        | F                        | Premenopausal                    | 37.3                  |      |      | Not recorded               |      | K:100%        | NSMC                       |                                                       |
| <b>Sathyapalan, T 2017</b>   | 16 w     | United Kingdom       | Crossover  | yes                       | yes                       | 53F<br>27M               | Not specified                    | 55.1                  |      |      | 28.8                       |      | Not specified | Subclinical hypothyroidism |                                                       |
| <b>Sathyapalan, T 2017</b>   | 3 m      | United Kingdom       | Parallel   | yes                       | no                        | M                        | N/A                              | 52                    |      |      | 31.8                       |      | 31.6          | W: 100%                    | Type 2 Diabetes Mellitus and Subclinical Hypogonadism |
| <b>Ryan-Borchers, T 2004</b> | 16 w     | USA                  | Parallel   | yes                       | yes                       | F                        | Postmenopausal                   | 56.1                  | 55.9 | 55.4 | 27.9                       | 28   | 28.5          | W: 94%<br>A:4%<br>AI: 2%   | NSMC                                                  |

\*:Average of total intervention groups, AA: African American, A: Asian, AI: American Indian, B: Black, C: Chinese, IN: Indian, JP: Japanese, NSMC: No significant medical conditions, Pl: Placebo, W: White/Caucasian, WH: White Hispanic, K: Korean, O: Other racial background, Z: Assumption based on the origin of the study, d:days, m: months, y:years

### **Appendix 3**

#### Intervention and Control/Placebo Characteristics

**Appendix 3: Data extraction of included studies: Identification and Intervention**

| Identification       | Intervention                                            |                                                                                                                                 |                                      |                                                           |                               |                          |                       |
|----------------------|---------------------------------------------------------|---------------------------------------------------------------------------------------------------------------------------------|--------------------------------------|-----------------------------------------------------------|-------------------------------|--------------------------|-----------------------|
|                      | First Author                                            | Amount given                                                                                                                    | Placebo/Control Type                 | Measurement interval                                      | Intervention Group Number (n) | Placebo Group Number (n) | Supplement/ Whole Soy |
| <b>Bitto, A</b>      | 54mg/day                                                | Tablets appeared similar and had a similar taste. The tablets also contained calcium carbonate (500 mg) and vitamin D3 (400 IU) | 3 years                              | 40                                                        | 37                            | SupplementG              | 2                     |
| <b>Bruce, B</b>      | 50mg<br>3 times/day                                     | Maltodextrin with 10% caramel colour                                                                                            | 90 days                              | 22                                                        | 16                            | SupplementI              | 2                     |
| <b>Dillingham, A</b> | Low:<br>1.64±0.19mg/day<br>High:<br>61.7±7.4mg/day      | Milk Protein Isolate                                                                                                            | 29 days                              | 35 in total                                               |                               | SupplementI              | 3                     |
| <b>Duncan, A</b>     | Low:<br>64 ± 9.2mg/day<br>High:<br>128±16mg/day         | 0.11 ± 0.01mg isoflavone powder                                                                                                 | Days 2–5 of menstrual cycles 3 and 4 | 14 in total                                               |                               | SupplementI              | 3                     |
| <b>Duncan, A</b>     | Low:<br>64 ± 9.2mg/day<br>High:<br>128±16mg/day         | 0.11 ± 0.01mg isoflavone powder                                                                                                 | 93 days                              | n= 18, except for the low-iso diet period, for which n=17 |                               | SupplementI              | 3                     |
| <b>Jayagopal, V</b>  | 30 g of isolated soy protein with 132 mg of isoflavones | 30 g of pure microcrystalline cellulose                                                                                         | 12 weeks                             | 32 in total                                               |                               | SupplementI              | 2                     |

\* : Total for each thyroid hormone control group, EQ: Equol Supplement, G: Genistein supplement, HI: Hypocotyl isoflavones supplement, I: Isoflavone supplement, IF: Isoflavones, PHY: Phytoestrogen, SP: soy protein powder

**Appendix3 continued**

| Identification        | Intervention                                                        |                                                                                                                                     |                      |                               |      |                                  |                          |                                           |
|-----------------------|---------------------------------------------------------------------|-------------------------------------------------------------------------------------------------------------------------------------|----------------------|-------------------------------|------|----------------------------------|--------------------------|-------------------------------------------|
| First Author          | Amount given                                                        | Placebo/Control Type                                                                                                                | Measurement interval | Intervention Group Number (n) |      | Placebo/Control Group Number (n) | Supplement/ Whole Soy    | No intervention groups (placebo included) |
| <b>Khaodhiar, L</b>   | Low: 40 mg DRI /day<br>High: 60 mg DRI /day                         | Soft-gel capsule containing 0g of concentrated isoflavone                                                                           | 4 weeks              | Low                           | High | 45                               | Supplement <sup>I</sup>  | 3                                         |
|                       |                                                                     |                                                                                                                                     |                      | 48                            | 49   |                                  |                          |                                           |
| <b>Lazarvic, B</b>    | 30mg/day                                                            | Identical in both capsule and container appearance                                                                                  | Not stated           | 23                            |      | 17                               | Supplement <sup>G</sup>  | 2                                         |
| <b>Mittal, N</b>      | 75 mg/day                                                           | Identical in size, shape and colour and contained identical amounts if the supplementary micronutrients in the intervention tablets | 12 weeks             | 21                            |      | 22                               | Supplement <sup>I</sup>  | 2                                         |
| <b>Persky, V</b>      | Low: 56mg/day<br>High: 90mg/day                                     | Casein (0 mg total isoflavones/g protein                                                                                            | 3 months             | 24                            | 22   | 25,26,24*                        | Supplement <sup>I</sup>  | 3                                         |
| <b>Sathyapalan, T</b> | Control: 7.5 g SP, 0mg IF<br>High: 7.5 g SP, 33mg IF<br>Twice a day | 7.5 g of the isolated soy protein (0g isoflavone)                                                                                   | 6 months             | 100                           |      | 100                              | Supplement <sup>I</sup>  | 2                                         |
| <b>Sathyapalan, T</b> | Low: 30 g SP, 2mg PHY<br>High: 30g SP, 16mg PHY, Once a day         | No control or placebo                                                                                                               | 3 months             | 48                            |      | 48                               | Supplement <sup>SP</sup> | 2                                         |

\* : Total for each thyroid hormone control group, EQ: Equol Supplement, G: Genistein supplement, HI: Hypocotyl isoflavones supplement, I: Isoflavone supplement, IF: Isoflavones, PHY: Phytoestrogen, SP: soy protein powder



| Appendix 3 continued    |                                                                                       |                                                                              |                      |                               |                           |                                  |                          |                                           |
|-------------------------|---------------------------------------------------------------------------------------|------------------------------------------------------------------------------|----------------------|-------------------------------|---------------------------|----------------------------------|--------------------------|-------------------------------------------|
| Identification          | Intervention                                                                          |                                                                              |                      |                               |                           |                                  |                          |                                           |
| First Author            | Amount given                                                                          | Placebo/Control Type                                                         | Measurement interval | Intervention Group Number (n) |                           | Placebo/Control Group Number (n) | Supplement/ Whole Soy    | No intervention groups (placebo included) |
| <b>Steinberg, F</b>     | Low: 80mg/day<br>High:120mg/day                                                       | Placebo tablets:<br>Filler materials<br>and common<br>processing aids.       | 1 year               | 135                           |                           | 134                              | Supplement <sup>HI</sup> | 3                                         |
| <b>Tousen, Y</b>        | Low: 2mg/day<br>Medium:6mg/day<br>High: 10mg/day                                      | Lactose tablets<br>identical in<br>appearance to<br>intervention<br>tablets. | 6 months             | Low                           | Medium                    | 21                               | Supplement <sup>EQ</sup> | 4                                         |
|                         |                                                                                       |                                                                              |                      | 25                            | 23                        |                                  |                          |                                           |
|                         |                                                                                       |                                                                              |                      | High                          |                           |                                  |                          |                                           |
|                         |                                                                                       |                                                                              |                      | 24                            |                           |                                  |                          |                                           |
| <b>Yim, C</b>           | 120mg/day                                                                             | Not stated                                                                   | Not stated           | 34                            |                           | 20                               | Supplement <sup>I</sup>  | 2                                         |
| <b>Sathyapalan, T</b>   | 30 g isolated soy<br>(isoflavone-free)<br>protein/day                                 | 30 g casein<br>protein /day                                                  | 8 weeks              | 80                            |                           | 80                               | Supplement <sup>SP</sup> | 2                                         |
| <b>Sathyapalan, T</b>   | 15 g<br>soy protein with<br>66 mg of<br>isoflavones/ day                              | 15 g soy<br>protein alone<br>without any<br>isoflavones/day                  | 3 months             | 85                            |                           | 86                               | Supplement <sup>I</sup>  | 2                                         |
| <b>Ryan-Borchers, T</b> | Soy Milk: 80 mg<br>isoflavones/day<br>Cow's Milk: 80<br>mg isoflavones<br>tablet/day. | Cow's milk and<br>placebo<br>supplement                                      | 16 weeks             | Soy Milk                      | Cow's Milk<br>&Supplement | 27                               | Supplement <sup>I</sup>  | 3                                         |
|                         |                                                                                       |                                                                              |                      | 25                            | 25                        |                                  |                          |                                           |

\* : Total for each thyroid hormone control group, A: Implied from the paper (not stated), EQ: Equol Supplement, G: Genistein supplement, HI: Hypocotyl isoflavones supplement, I: Isoflavone supplement, IF: Isoflavones, PHY: Phytoestrogen, SP: soy protein
